# Supplementary material for: A PPy/MoS2 core–shell heterojunction modified by carbon dots exhibits high photocatalytic antibacterial performance
Source: Royal Society of Chemistry journal article supplement (doi:10.1039/d2nj04388b), 2022-01-01
Supplement: d2nj04388b1.pdf [file d2nj04388b1.pdf]

## The PPy/MoS<sub>2</sub> core-shell heterojunction modified by carbon dot has high photocatalytic antibacterial performance

Mengmeng Zhang<sup>a</sup>; Sha Han<sup>a</sup>; Xiaohui Niu<sup>a</sup>; Hongxia Li<sup>a</sup>; Deyi zhang<sup>a</sup>; Haiyan Fan<sup>c</sup>; Xiaoyu Liu<sup>a</sup>,  
Kunjie Wang<sup>\*a,b</sup>

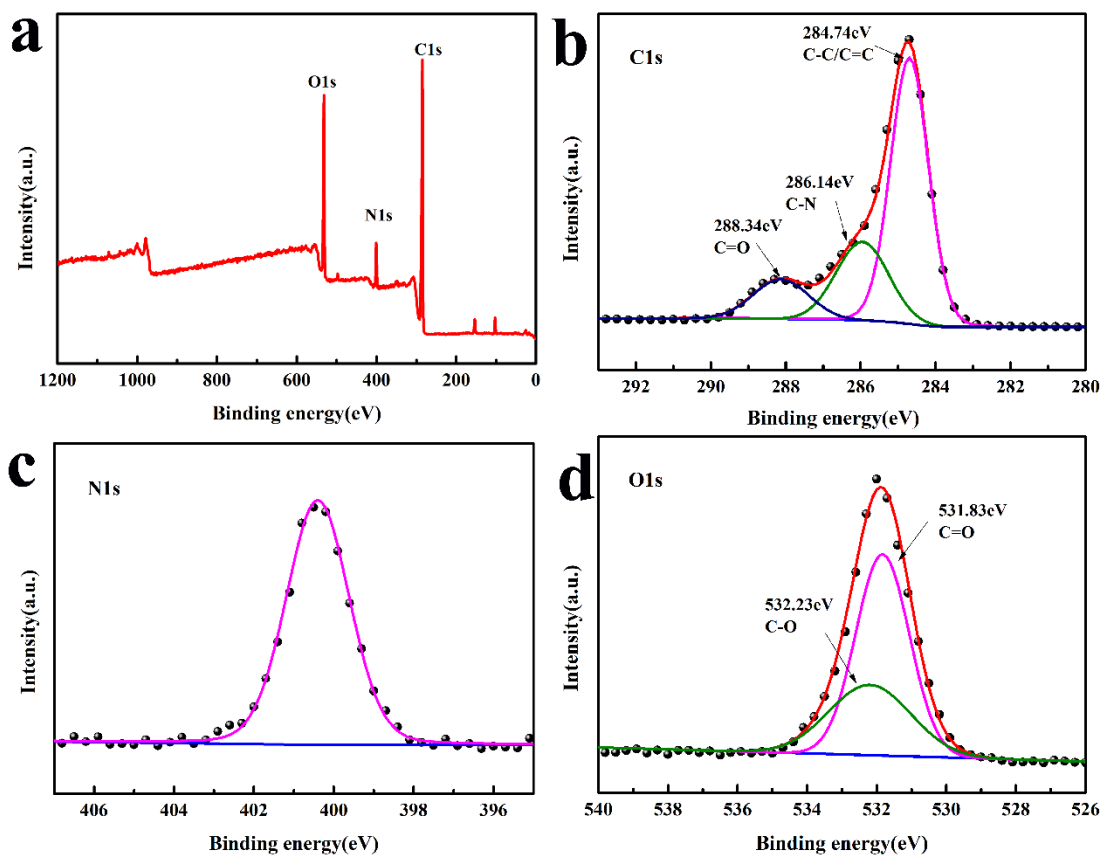

**Fig. S1.** XPS spectrum of CQDs: (a) full spectrum; (b) C1s spectrum; (c) N1s spectrum; (d) O1s spectrum

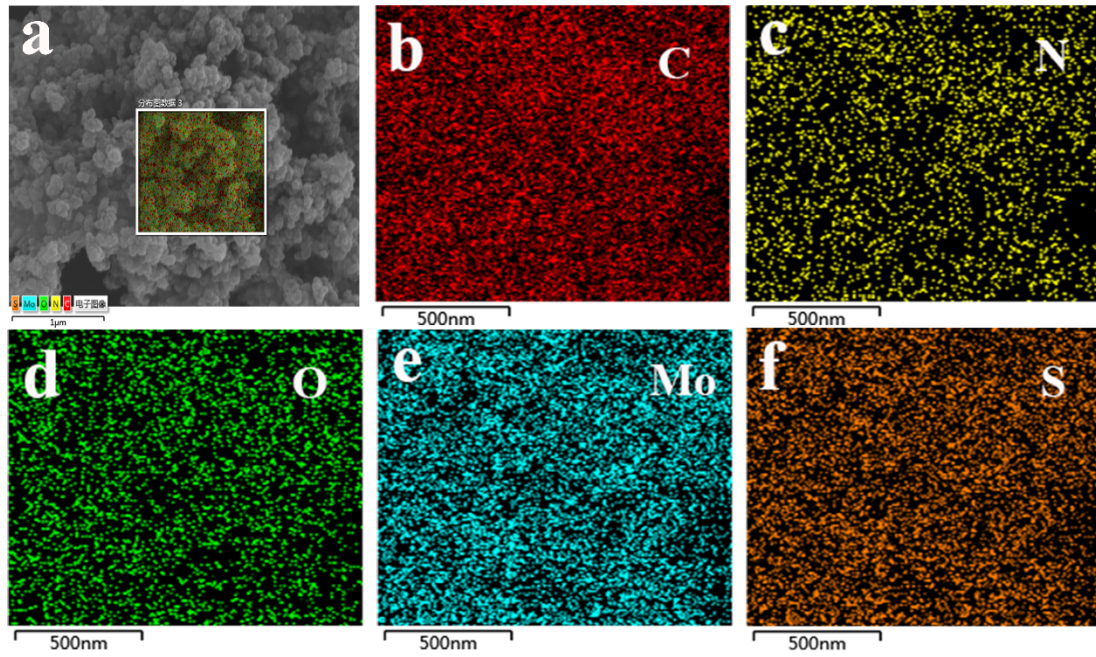

**Fig. S2.** (a) SEM image of PPy/MoS<sub>2</sub>/CQDs nanocomposite, EDS element map: (b) C element, (c) N element, (d) element, (e) Mo element, (f) S element

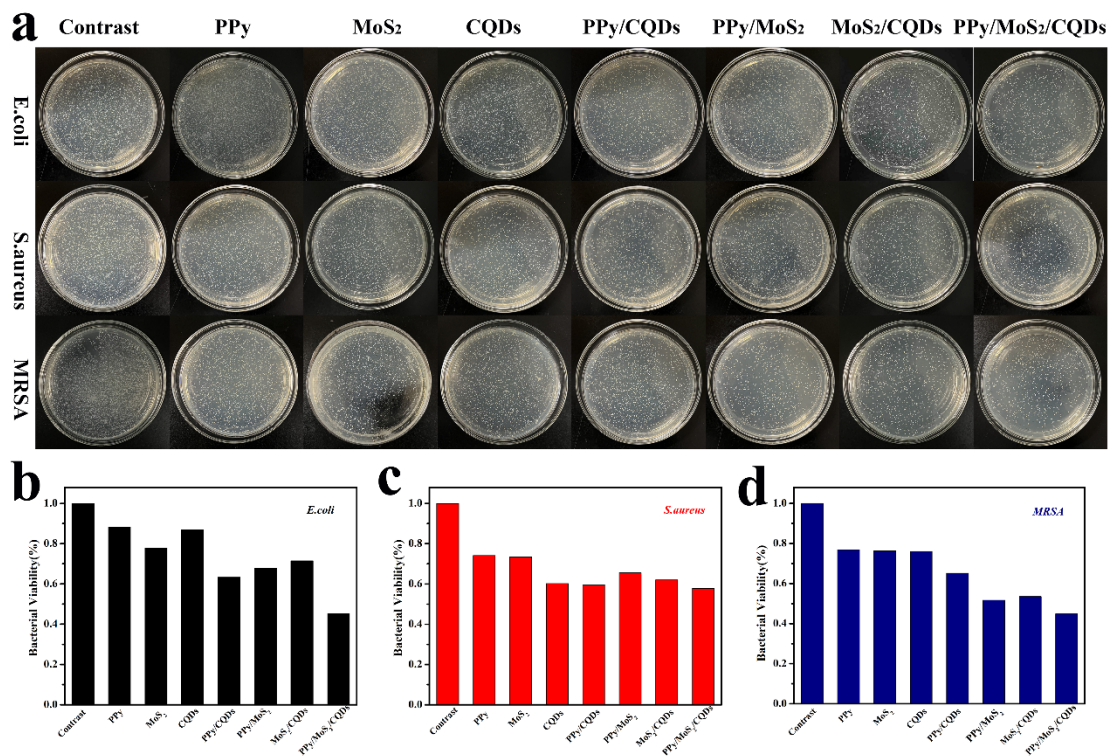

**Fig. S3.** (a) Comparison of in vitro antibacterial activities of different materials against Escherichia coli, Staphylococcus aureus and Methicillin-resistant Staphylococcus aureus under dark conditions, (b) Survival rate of E.coli under different materials, (a) Survival rate of S.aureus under different materials, (c) Survival rate of MRSA under different materials
